# Supplementary material
Source: publisher figshare collection journal article supplement (https://sage.figshare.com/ndownloader/files/18725222)
Supplement: Supplementary file 1 [file 18725222]

## Sheet: BP
ID	Description	GeneRatio	BgRatio	pvalue	p.adjust	qvalue	geneID	Count
GO:0001819	positive regulation of cytokine production	108/2628	425/23239	2.35425e-16	5.23602e-14	3.24271e-14	Il1a/Cadm1/Cx3cl1/Htr2b/Prg2/Il12b/Ptgs2/Wnt11/Il10/Cd83/Osm/Cyp2j6/Prg3/Serpine1/Scamp5/Thbs1/Cebpb/C3ar1/Egr1/Mmp12/Tnfsf4/Elane/Cd34/Nr4a3/Ccl2/Tigit/Ccr7/Adam8/Cd14/Il1b/Il1rl1/Ffar2/Tnfsf9/Ccl4/Clec9a/Cd200/Ccl3/Hilpda/Il1rn/Card11/Cd276/Ulbp1/Il6/Ccr5/Mcoln2/Il12rb1/C5ar1/Ptafr/Tlr3/Havcr2/Ifng/Cd209d/Il18r1/Rgcc/Il1rl2/Rab7b/P2ry2/Clec4n/Jak2/Cd274/Cd6/Tmf1/Fzd5/Gata3/Akirin2/Cd36/Slamf6/C…	108
GO:0007265	Ras protein signal transduction	94/2628	400/23239	2.91594e-12	2.36625e-10	1.46544e-10	Pdpn/Ednra/Rab4a/Arhgef25/Lpar1/Rab34/Kank1/Celsr1/Rab15/Iqgap3/Kitl/Arfgef3/Rhov/Igf1/Rasgrp3/Arhgef40/Lpar4/Tgfb2/Spry2/Rhobtb1/Ctnnal1/Plekhg5/P2ry10/Net1/Spry1/Rnd2/Stmn1/Ect2/Rab20/Abca1/Gna12/Plk2/Prag1/Timp2/Arhgef39/Arf6/Ssx2ip/Rhoc/Rab7b/Foxm1/Rac3/Rac1/Rabgef1/Csf1/Vav2/Apoe/Jun/Rab12/Rap2a/Dok2/Adgrg1/Rras2/Ophn1/Hras/Kras/Rasa2/Ralgps1/Rasal3/Rab6b/Rasgrp1/Lat/Dnajc27/Arhgef10/Vav3/Rh…	94
GO:0050663	cytokine secretion	59/2628	222/23239	2.16795e-10	1.16237e-08	7.19867e-09	Gas6/Il1a/Cadm1/Cx3cl1/Htr2b/Il10/Osm/Cyp2j6/Fbln1/Scamp5/Mmp12/Tnfsf4/Cd34/Chil1/Il1r2/Ccr7/Trem1/Cd14/Il1b/Il1rl1/Ffar2/Clec9a/Tnfrsf4/Tnfaip3/Ccl3/Abca1/Card11/Cd276/Il6/Ccr5/Mcoln2/Havcr2/Ifng/Cd209d/Rgcc/Clec4n/Cd274/C5ar2/Fzd5/Rabgef1/Gata3/Ffar4/Cd36/Arg2/Tlr2/Ptger4/Tnfrsf9/Rasgrp1/Tlr5/Il4ra/Clec4e/Tnf/Flt3/Tnfrsf14/Casp4/Fn1/Mmp8/Zbtb7b/Slamf1	59
GO:0042136	neurotransmitter biosynthetic process	35/2628	102/23239	7.07513e-10	3.37192e-08	2.08826e-08	Slc1a3/Cav1/Ptgs2/Il10/Prg3/Wdr35/Ddah2/Hrh1/Igf1/Cd34/Il1b/Slc7a2/Ulbp1/Il6/Ifng/Jak2/Shmt1/Gla/Akt1/Acp5/Cd36/Tha1/Klrk1/Tlr2/Hdc/Tlr5/Ass1/Aif1/Tnf/Insr/Klf2/Mmp8/Clu/Cyp2d22/Gad1	35
GO:0050707	regulation of cytokine secretion	53/2628	195/23239	7.3715e-10	3.4855e-08	2.1586e-08	Gas6/Il1a/Cadm1/Cx3cl1/Htr2b/Il10/Osm/Cyp2j6/Fbln1/Scamp5/Mmp12/Tnfsf4/Cd34/Il1r2/Ccr7/Cd14/Il1b/Il1rl1/Ffar2/Clec9a/Tnfrsf4/Tnfaip3/Ccl3/Cd276/Il6/Ccr5/Havcr2/Ifng/Cd209d/Rgcc/Clec4n/Cd274/C5ar2/Fzd5/Rabgef1/Gata3/Ffar4/Cd36/Arg2/Tlr2/Ptger4/Tnfrsf9/Rasgrp1/Tlr5/Il4ra/Clec4e/Tnf/Flt3/Tnfrsf14/Casp4/Fn1/Mmp8/Slamf1	53
GO:0045862	positive regulation of proteolysis	73/2628	316/23239	1.72577e-09	7.34276e-08	4.54743e-08	Dab2/Cyr61/Ecscr/Mmp14/F3/Plk3/Uaca/Ctgf/Pawr/Wdr35/Plk1/Prickle1/Rnf180/Khdc1b/Adam8/Il1b/S100a9/Plk2/Fyn/Myc/Gclc/Hspa1a/Ifng/Ppp2ca/Jak2/S100a8/Lgmn/Smurf1/Mtch1/Pmaip1/Akt1/Aurka/Apoe/Spon1/Bbs7/Smad7/Akirin2/Hip1r/Lck/Ptk2/Trib1/Fasl/Capn3/Gsk3b/Zfand2a/Csnk1e/Tbc1d10a/Gramd4/Pparg/Dapk1/Axin1/Adam9/Mdm2/Arih2/Rock2/Tnf/Rnf139/Fis1/Ifi27l2a/Rack1/Cln6/Casp4/Rps3/Bag6/Arl6ip5/Rnf144a/Ctnnd1/C…	73
GO:0048771	tissue remodeling	50/2628	187/23239	4.03071e-09	1.46693e-07	9.08484e-08	Il1a/Timp1/Spp1/Ctsk/Epha2/Cspg4/Gpnmb/Cav1/Gja1/Mmp14/Dll4/Mertk/Igf1/Dcstamp/Tgm2/Angpt2/Tgfb2/Adam8/P3h4/Lif/Jag1/Enpp1/Chd7/Mmp2/Vdr/Ltbp3/Tfrc/Il6/Tmem64/Rac1/S1pr1/Axl/Cd38/Acp5/Tnfrsf11a/Ptger4/Hif1a/B4galt1/Inpp4b/Suco/Mdm2/Tmbim1/Rock2/Itga4/Capn1/Bmpr2/Bak1/Itgb3/Car2/Il23a	50
GO:1901214	regulation of neuron death	78/2628	353/23239	4.16739e-09	1.49851e-07	9.28041e-08	Cx3cl1/Ccl12/Gpnmb/Trim2/Il10/Mt3/Pawr/Kdr/Kcnma1/Nr4a2/Igf1/Rapsn/Cebpb/Mybl2/Egr1/Tgfb2/Cd34/Nr4a3/Adam8/Birc5/Il1b/Vegfb/Tgfb3/Ccl3/Fyn/Serpinf1/Ppp1r13b/Il6/Gclc/C5ar1/Clcf1/Mag/Prnp/Bhlhb9/Jak2/Dtnbp1/Lgmn/Kcnip3/Axl/Stxbp1/Rilpl1/Mt1/Gata3/Pmaip1/Egln3/Ube2m/Apoe/Jun/Rras2/Btg2/Zfp746/Fos/Hras/Fasl/Gsk3b/Hif1a/Kras/Mcl1/Aars/Slc7a11/Ccl5/Ddit3/Retreg1/Rel/Set/Hdac4/Bcl2/Tnf/Fis1/Rack1/Prdx2…	78
GO:0042133	neurotransmitter metabolic process	42/2628	145/23239	5.4006e-09	1.8746e-07	1.16096e-07	Slc1a3/Cav1/Ptgs2/Il10/Atp2b2/Prg3/Wdr35/Ddah2/Hrh1/Igf1/Rnf180/Cd34/Il1b/Slc7a2/Phgdh/Ulbp1/Il6/Ifng/Jak2/Shmt1/Gla/Akt1/Acp5/Cd36/Tha1/Klrk1/Tlr2/Gcsh/Por/Hdc/Tlr5/Ass1/Aif1/Aldh6a1/Tnf/Insr/Klf2/Mmp8/Ache/Clu/Cyp2d22/Gad1	42
GO:0043277	apoptotic cell clearance	18/2628	36/23239	1.04479e-08	3.234e-07	2.00285e-07	Gas6/Mertk/Thbs1/Tgm2/Ccl2/Rhobtb1/Rac3/Rac1/Axl/Cd300lf/Pear1/Cd36/Nr1h3/Jmjd6/Abca7/Rara/C3/Itgb3	18
GO:0043523	regulation of neuron apoptotic process	60/2628	256/23239	2.69781e-08	7.36379e-07	4.56046e-07	Cx3cl1/Ccl12/Trim2/Mt3/Pawr/Kdr/Kcnma1/Nr4a2/Rapsn/Cebpb/Mybl2/Egr1/Tgfb2/Nr4a3/Adam8/Birc5/Il1b/Vegfb/Tgfb3/Ccl3/Fyn/Gclc/C5ar1/Clcf1/Mag/Prnp/Bhlhb9/Jak2/Lgmn/Kcnip3/Axl/Stxbp1/Mt1/Gata3/Pmaip1/Egln3/Ube2m/Apoe/Jun/Btg2/Hras/Fasl/Gsk3b/Hif1a/Kras/Mcl1/Aars/Ddit3/Retreg1/Set/Hdac4/Bcl2/Tnf/Fis1/Prdx2/Xiap/Itga1/Gpx1/Draxin/Snca	60
GO:0071559	response to transforming growth factor beta	51/2628	205/23239	3.81419e-08	9.95836e-07	6.1673e-07	Dab2/Pmepa1/Cd109/Nrep/Folr1/Npnt/Cav1/Ptprk/Htra3/Dbn1/Rasl11b/Sox9/Yes1/Eid2/Serpine1/Thbs1/Tgfb2/Itgb5/Ccl2/Cdkn2b/Got1/Bmpr1a/Skil/Bambi/Tgfb3/Ltbp3/Fyn/Htra1/Chst11/Smad6/Col4a2/Smurf1/Jun/Smad7/Ldlrad4/Map3k7/Ptk2/Zfp36l1/Fos/Hspa5/Twsg1/Runx3/Axin1/Adam9/Zeb1/Cited2/Rock2/Map3k1/Dusp22/Bmpr2/Acvr1b	51
GO:0010769	regulation of cell morphogenesis involved in differentiation	72/2628	333/23239	4.14757e-08	1.06893e-06	6.62e-07	Enpp2/Dab2/Pdpn/Ephb3/Dbn1/Kank1/Lpar3/Olfm4/Fbln1/Sema4c/Bcar1/Sema6d/Ryk/Lzts1/Carmil1/Arc/Lrp8/Plxna1/Akap5/Net1/Ifrd1/Skil/Rnd2/Cit/Ccr5/Mgll/Lrp4/Mag/Ppp1r9a/Fgf13/Bhlhb9/Rac3/Dtnbp1/Rac1/Nedd4/Stau2/Tnfrsf12a/Ust/Cttn/Sgk1/Apoe/Rap2a/Rufy3/Ptk2/Eef2k/Plxnc1/Syne1/Gsk3b/Ptprs/Ndel1/Ulk2/Ttl/Ttc3/Ywhah/Rcc2/Golga4/Baiap2/Spg20/Sipa1l1/Rapgef2/Olfm1/Bcl11a/Id1/Tiam1/Zswim6/Bmpr2/Fn1/Itgb3/Megf…	72
GO:0071560	cellular response to transforming growth factor beta stimulus	49/2628	200/23239	1.16481e-07	2.59062e-06	1.60439e-06	Dab2/Pmepa1/Cd109/Nrep/Folr1/Npnt/Cav1/Ptprk/Htra3/Dbn1/Rasl11b/Sox9/Yes1/Eid2/Serpine1/Thbs1/Tgfb2/Itgb5/Ccl2/Cdkn2b/Got1/Bmpr1a/Skil/Bambi/Tgfb3/Ltbp3/Fyn/Htra1/Chst11/Smad6/Col4a2/Smurf1/Jun/Smad7/Ldlrad4/Map3k7/Ptk2/Zfp36l1/Fos/Hspa5/Twsg1/Axin1/Adam9/Zeb1/Cited2/Map3k1/Dusp22/Bmpr2/Acvr1b	49
GO:0007179	transforming growth factor beta receptor signaling pathway	42/2628	161/23239	1.44661e-07	3.1704e-06	1.96346e-06	Dab2/Pmepa1/Cd109/Nrep/Folr1/Npnt/Cav1/Ptprk/Htra3/Rasl11b/Eid2/Thbs1/Tgfb2/Itgb5/Ccl2/Cdkn2b/Got1/Bmpr1a/Skil/Bambi/Tgfb3/Ltbp3/Htra1/Chst11/Smad6/Smurf1/Jun/Smad7/Ldlrad4/Map3k7/Ptk2/Fos/Hspa5/Twsg1/Axin1/Adam9/Zeb1/Cited2/Map3k1/Dusp22/Bmpr2/Acvr1b	42
GO:0032963	collagen metabolic process	30/2628	97/23239	1.62995e-07	3.50819e-06	2.17265e-06	Ctsk/P3h2/Mrc2/Arg1/Mmp14/Ctgf/Cyp2j6/Mmp11/Mmp7/Serpine1/Ccl2/Plod2/P3h3/P3h4/Got1/Tgfb3/Mmp2/Il6/Errfi1/Pdgfb/Rgcc/Creb3l1/Hif1a/Pparg/Ctsb/Mmp19/Suco/Id1/Cbx8/Mmp8	30
GO:0007266	Rho protein signal transduction	47/2628	191/23239	1.82067e-07	3.8497e-06	2.38415e-06	Pdpn/Ednra/Arhgef25/Lpar1/Kank1/Celsr1/Rhov/Arhgef40/Lpar4/Rhobtb1/Ctnnal1/Plekhg5/P2ry10/Net1/Rnd2/Stmn1/Ect2/Abca1/Gna12/Prag1/Arhgef39/Rhoc/Rac3/Rac1/Vav2/Apoe/Adgrg1/Ophn1/Arhgef10/Vav3/Rhoh/Baiap2/Rock2/Dnmbp/Pecam1/Cdc42ep3/Arhgef37/Bcl6/Tiam1/Gpr18/P2ry10b/Arhgef18/Rnd3/Cdc42ep2/Trio/Rhoj/Cdc42ep5	47
GO:0016055	Wnt signaling pathway	83/2628	418/23239	2.09304e-07	4.3416e-06	2.68879e-06	Dab2/Sall1/Cpe/Folr1/Cav1/Wnt11/Sostdc1/Dkk3/Kank1/Mertk/Celsr1/Dact3/Sox9/Amotl1/Dact1/Hic1/Sox4/Ctnnd2/Ankrd6/Egr1/Prickle1/Ccnd1/Ryk/Dapk3/Znrf3/Reck/Cdh1/Tnfaip3/Sdc1/Rnf43/Bambi/Tmem88/Gpc3/Otulin/Myc/Tmem64/Ndrg2/Lrp4/Csnk1g2/Ccne1/Rac1/Fzd5/Depdc1b/Axl/Gata3/Apoe/Tcf7l2/Ldb1/Siah2/Tcf7/Lef1/Rnf220/Csnk1g3/Tlr2/Gsk3b/Csnk1e/Tle1/Fzd7/Tle4/Ddit3/Axin1/Tnks2/Cdk14/Trpm4/Foxo1/Gnaq/Dvl3/Csnk2a…	83
GO:0051402	neuron apoptotic process	62/2628	283/23239	2.16279e-07	4.44654e-06	2.75378e-06	Cx3cl1/Ccl12/Trim2/Mt3/Pawr/Kdr/Kcnma1/Nr4a2/Rapsn/Cebpb/Mybl2/Egr1/Tgfb2/Nr4a3/Adam8/Birc5/Il1b/Vegfb/Tgfb3/Ccl3/Fyn/Cit/Gclc/C5ar1/Clcf1/Mag/Prnp/Bhlhb9/Jak2/Lgmn/Kcnip3/Axl/Stxbp1/Mt1/Gata3/Pmaip1/Egln3/Ube2m/Apoe/Jun/Btg2/Hras/Fasl/Gsk3b/Hif1a/Kras/Mcl1/Aars/Ddit3/Retreg1/Set/Hdac4/Bcl2/Tnf/Fis1/Prdx2/Pigt/Xiap/Itga1/Gpx1/Draxin/Snca	62
GO:0050715	positive regulation of cytokine secretion	38/2628	141/23239	2.26604e-07	4.5663e-06	2.82795e-06	Il1a/Cadm1/Htr2b/Il10/Osm/Cyp2j6/Scamp5/Mmp12/Cd34/Ccr7/Cd14/Il1b/Il1rl1/Ffar2/Clec9a/Ccl3/Cd276/Ccr5/Havcr2/Ifng/Cd209d/Rgcc/Clec4n/Cd274/Fzd5/Gata3/Cd36/Tlr2/Ptger4/Rasgrp1/Il4ra/Clec4e/Tnf/Flt3/Tnfrsf14/Casp4/Mmp8/Slamf1	38
GO:0060828	regulation of canonical Wnt signaling pathway	51/2628	216/23239	2.26388e-07	4.5663e-06	2.82795e-06	Dab2/Folr1/Cav1/Wnt11/Sostdc1/Dkk3/Kank1/Dact3/Sox9/Dact1/Sox4/Ctnnd2/Ankrd6/Egr1/Prickle1/Dapk3/Znrf3/Reck/Cdh1/Bambi/Tmem88/Gpc3/Otulin/Tmem64/Lrp4/Csnk1g2/Apoe/Tcf7l2/Siah2/Rnf220/Csnk1g3/Gsk3b/Csnk1e/Tle1/Fzd7/Tle4/Ddit3/Axin1/Tnks2/Cdk14/Trpm4/Foxo1/Gnaq/Ptpro/Xiap/Rspo1/Pfdn5/Ctnnd1/Thra/Yap1/Draxin	51
GO:0198738	cell-cell signaling by wnt	83/2628	420/23239	2.58273e-07	5.11859e-06	3.16998e-06	Dab2/Sall1/Cpe/Folr1/Cav1/Wnt11/Sostdc1/Dkk3/Kank1/Mertk/Celsr1/Dact3/Sox9/Amotl1/Dact1/Hic1/Sox4/Ctnnd2/Ankrd6/Egr1/Prickle1/Ccnd1/Ryk/Dapk3/Znrf3/Reck/Cdh1/Tnfaip3/Sdc1/Rnf43/Bambi/Tmem88/Gpc3/Otulin/Myc/Tmem64/Ndrg2/Lrp4/Csnk1g2/Ccne1/Rac1/Fzd5/Depdc1b/Axl/Gata3/Apoe/Tcf7l2/Ldb1/Siah2/Tcf7/Lef1/Rnf220/Csnk1g3/Tlr2/Gsk3b/Csnk1e/Tle1/Fzd7/Tle4/Ddit3/Axin1/Tnks2/Cdk14/Trpm4/Foxo1/Gnaq/Dvl3/Csnk2a…	83
GO:0001505	regulation of neurotransmitter levels	75/2628	370/23239	3.43709e-07	6.47013e-06	4.00701e-06	Htr7/Slc1a3/Ncs1/Cav1/Sphk1/Ptgs2/Il10/Celsr1/Atp1a2/Sncaip/Atp2b2/Sv2a/Gfap/Prg3/Wdr35/Ddah2/Hrh1/Igf1/Nr3c2/Rnf180/Cd34/Il1b/Slc1a2/Slc7a2/Phgdh/Ulbp1/Il6/Per2/Ifng/Erc1/P2ry2/Ppp1r9a/Jak2/Dtnbp1/Stxbp1/Shmt1/Gla/Akt1/Acp5/Stxbp5/Cd36/Tha1/Klrk1/Tlr2/Gsk3b/Ptger4/Gcsh/Atp2a2/Slc7a11/Por/Hdc/Tlr5/Prkcb/Ass1/Cyth1/Aif1/Aldh6a1/Tnf/Insr/P2ry1/Arl6ip5/Prkce/Scrib/Klf2/Otof/Apba1/Mmp8/Ache/Nat8l/Clu…	75
GO:0030111	regulation of Wnt signaling pathway	61/2628	283/23239	4.87455e-07	8.60931e-06	5.33182e-06	Dab2/Sall1/Folr1/Cav1/Wnt11/Sostdc1/Dkk3/Kank1/Dact3/Sox9/Dact1/Hic1/Sox4/Ctnnd2/Ankrd6/Egr1/Prickle1/Dapk3/Znrf3/Reck/Cdh1/Tnfaip3/Rnf43/Bambi/Tmem88/Gpc3/Otulin/Tmem64/Lrp4/Csnk1g2/Depdc1b/Apoe/Tcf7l2/Siah2/Lef1/Rnf220/Csnk1g3/Tlr2/Gsk3b/Csnk1e/Tle1/Fzd7/Tle4/Ddit3/Axin1/Tnks2/Cdk14/Trpm4/Foxo1/Gnaq/Rnf213/Tiam1/Ptpro/Xiap/Rspo1/Pfdn5/Ctnnd1/Thra/Yap1/Hmga2/Draxin	61
GO:0060070	canonical Wnt signaling pathway	58/2628	272/23239	1.32985e-06	2.09599e-05	1.29807e-05	Dab2/Folr1/Cav1/Wnt11/Sostdc1/Dkk3/Kank1/Dact3/Sox9/Dact1/Sox4/Ctnnd2/Ankrd6/Egr1/Prickle1/Dapk3/Znrf3/Reck/Cdh1/Sdc1/Bambi/Tmem88/Gpc3/Otulin/Myc/Tmem64/Lrp4/Csnk1g2/Fzd5/Gata3/Apoe/Tcf7l2/Siah2/Tcf7/Lef1/Rnf220/Csnk1g3/Gsk3b/Csnk1e/Tle1/Fzd7/Tle4/Ddit3/Axin1/Tnks2/Cdk14/Trpm4/Foxo1/Gnaq/Dvl3/Ptpro/Xiap/Rspo1/Pfdn5/Ctnnd1/Thra/Yap1/Draxin	58
GO:0031346	positive regulation of cell projection organization	85/2628	454/23239	1.93171e-06	2.87126e-05	1.7782e-05	Enpp2/Htr7/Atp8a2/Cx3cl1/Adamts1/Nav3/Sphk1/Ptn/Dbn1/Lpar1/Gpm6a/Elavl4/Dpysl3/Lpar3/Fscn1/Neurl1a/Kit/Serpine2/Scn1b/Ccr7/Carmil1/Lif/Lrp8/Plxna1/Akap5/Pacsin1/S100a9/Hap1/P2ry12/Skil/Rnd2/Tgfb3/Fyn/Serpinf1/Avil/Il6/Kdm1a/Fgfr1/P2ry2/Ppp1r9a/Bhlhb9/Rac1/Stau2/Smurf1/Tnfrsf12a/Sgk1/Apoe/Bbs4/Rufy3/Eef2k/Hras/D16Ertd472e/Plxnc1/Cbfa2t2/Anln/Cxcr4/Gsk3b/Ehd1/Ndel1/Hspa5/Ezh2/Atmin/Prkcq/Tapt1/Golg…	85
GO:0007163	establishment or maintenance of cell polarity	47/2628	207/23239	2.14739e-06	3.13749e-05	1.94307e-05	Kif2c/Parva/Wnt11/Gja1/Kank1/Jam3/Amotl1/Fscn1/Rhov/Igf1/Spag5/Spry2/Sapcd2/Ccr7/Ndc80/Spry1/Eya1/Rnd2/Arf6/Rhoc/Fgf13/Spint2/Mark3/Cenpa/Kif20b/Ust/Gata3/Cd3g/Dlg3/Ophn1/Rufy3/Lmna/Wee1/Gsk3b/Parvg/Ndel1/Frmd4b/Hes1/Rhoh/Cyth1/Zw10/Rnd3/Amotl2/Scrib/Parvb/Cap1/Rhoj	47
GO:0043062	extracellular structure organization	60/2628	292/23239	3.1328e-06	4.39543e-05	2.72213e-05	Cyr61/Pmp22/Pdpn/Npnt/Phldb2/Aebp1/Mpo/Ctgf/Sox9/Col14a1/Spint1/Fbln1/Mmp11/Col18a1/Fscn1/Gfap/Sdc4/Apbb2/Flrt2/Tgfb2/Cd34/Plod2/Myo1e/P3h4/Col8a2/Olfml2b/Col27a1/Reck/Col11a2/Sdc1/Abca1/Aplp1/Lamb2/Rgcc/Spint2/Col4a2/Col4a1/Apoe/Efemp2/Loxl3/Ets1/Cd36/Abcg1/Cma1/Adamts14/Sh3pxd2b/Ptk2/Creb3l1/Dpp4/Ddr1/B4galt1/Adamtsl4/Ero1l/Dgat1/Tnf/Abca7/Fn1/Itgb3/Fech/Csgalnact1	60
GO:0031099	regeneration	34/2628	133/23239	3.50608e-06	4.8289e-05	2.99058e-05	Nrep/Mymk/Folr1/Gja1/Gfap/Serpine1/Cdk1/Igf1/Cebpb/Ccnd1/Lif/Rtn4rl1/Ifrd1/Mmp2/Plau/Lamb2/Mag/Jak2/Aurka/Jun/Klk8/Matn2/Capn3/Selenon/Ptprs/Ndel1/Ezh2/Fzd7/Mapk8ip3/Bcl2/Med1/Gpx1/Hopx/Yap1	34
GO:0045666	positive regulation of neuron differentiation	83/2628	447/23239	3.54721e-06	4.86325e-05	3.01185e-05	Sall1/Htr7/Atp8a2/Cx3cl1/Adamts1/Sphk1/Ptn/Dbn1/Lpar1/Elavl4/Dpysl3/Lpar3/Duoxa1/Neurl1a/Serpine2/Scn1b/Etv5/Lif/Lrp8/Nbl1/Plxna1/Akap5/Pacsin1/S100a9/Hap1/Socs2/Skil/Rnd2/Ect2/Bend6/Timp2/Fyn/Serpinf1/Avil/Il6/Ccr5/Ifng/Kdm1a/Fgfr1/P2ry2/Ppp1r9a/Bhlhb9/Rac1/Stau2/Smurf1/Impact/Tnfrsf12a/Sgk1/Apoe/Tgif1/Gdpd5/Rufy3/Eef2k/D16Ertd472e/Plxnc1/Cbfa2t2/Cxcr4/Gsk3b/Ehd1/Ndel1/Hspa5/Ezh2/Mapk8ip3/Ccl5/Z…	83
GO:0061564	axon development	88/2628	483/23239	4.04825e-06	5.47517e-05	3.39082e-05	Flrt3/Atp8a2/Pmp22/Nrep/Folr1/Ptprm/Gas1/Ephb3/Dbn1/Dscaml1/Lpar3/Nr4a2/Ccdc141/Sema4c/Apbb2/Egr2/Flrt2/Tgfb2/Sema6d/Nr4a3/Scn1b/Ryk/Rtn4rl1/Plxna1/Ifrd1/Skil/Rnd2/Ttc8/Stmn1/Unc5c/Mmp2/Ccr5/Mgll/Bcl11b/Lamb2/Lrp4/Mag/Fbxo45/Fgf13/Jak2/Rac1/Dst/Stxbp1/Tnfrsf12a/Ust/Gata3/Cttn/Apoe/Jun/Klk8/Matn2/Stxbp5/Nrp2/Rufy3/Ptk2/Plxnc1/Cxcr4/Gsk3b/Ptprs/Ndel1/Ddr1/Mapk8ip3/Ulk2/Runx3/Ttl/Usp33/Ablim1/Golga4…	88
GO:0048008	platelet-derived growth factor receptor signaling pathway	20/2628	60/23239	5.1075e-06	6.69662e-05	4.14728e-05	F3/Bcar1/Nr4a3/Myo1e/Apod/Csrnp1/Pdgfa/Pdgfb/Jak2/Tiparp/F7/Fer/Gab1/Hip1r/Zfand5/Ptgir/Itgb3/Txnip/Adipoq/Snca	20
GO:0050808	synapse organization	79/2628	424/23239	5.28641e-06	6.88609e-05	4.26461e-05	Flrt3/Sparc/Cadm1/Pmp22/Cacnb3/Synpo/Thbs2/Ephb3/Ptn/Sparcl1/Dbn1/Il10/Gpm6a/Atp2b2/Neurl1a/Dact1/Rapsn/Flrt2/Ctnnd2/Adgrb2/Arc/Etv5/Lrp8/Nrg2/Arhgap22/Adgrl2/Cdh1/Fyn/Abhd17c/Cdc20/Pdgfb/Ndrg2/Arf6/Lamb2/Lrp4/Fbxo45/Prnp/Ppp1r9a/Bhlhb9/Dtnbp1/Clstn1/Lgmn/Nedd4/Stau2/Fzd5/Col4a1/Cttn/Apoe/Klk8/Igsf9/Palld/Ophn1/Nrp2/Ptk2/Tubb5/Eef2k/Tlr2/Gsk3b/Ptprs/Abhd17b/Slc7a11/Baiap2/Snta1/Rock2/Hdac6/Sipa1l…	79
GO:0016358	dendrite development	58/2628	284/23239	5.52613e-06	7.11277e-05	4.405e-05	Csmd3/Ephb3/Dbn1/Lpar1/Elavl4/Fat3/Neurl1a/Dact1/Ctnnd2/Lzts1/Arc/Lrp8/Akap5/Pacsin1/Spire1/Plk2/Fyn/Cit/Bbs1/Cdc20/Arf6/Lrp4/Ppp1r9a/Bhlhb9/Dtnbp1/Btbd3/Rac1/Nedd4/Stau2/Sgk1/Apoe/Igsf9/Matn2/Rap2a/Bbs4/Eef2k/D16Ertd472e/Syne1/Gsk3b/Ptprs/Ezh2/Ywhah/Carm1/Baiap2/Rock2/Hdac6/Sipa1l1/Rapgef2/Camk1/Bcl11a/Id1/Cacna1f/Tiam1/Ppp1r9b/Palm/Lst1/Ache/Celsr2	58
GO:0090287	regulation of cellular response to growth factor stimulus	55/2628	265/23239	5.79928e-06	7.4253e-05	4.59855e-05	Dab2/Cyr61/Pmepa1/Cd109/Nrep/Msx1/Folr1/Npnt/Cav1/Htra3/Rasl11b/Sostdc1/Kdr/Eid2/Cd63/Thbs1/Fgf1/Spry2/Cdkn2b/Nbl1/Got1/Vegfb/Spry1/Skil/Bambi/Epn2/Tgfb3/Tmem204/Gpc3/Htra1/Chst11/Pdgfb/Lemd2/Fgfr1/Smad6/Nedd4/Smurf1/Gata3/Smad7/Fam20c/Tcf7l2/Ldlrad4/Creb3l1/Gpc1/Hif1a/Hspa5/Twsg1/Hes1/Prkcb/Axin1/Zeb1/Cited2/Spg20/Bmpr2/Ube2o	55
GO:0048588	developmental cell growth	52/2628	252/23239	1.21833e-05	0.000141784	8.78083e-05	Flrt3/Dbn1/Sox9/Lpar3/Col14a1/Sema4c/Igf1/Sema6d/Ryk/Plxna1/Ifrd1/Rnd2/Ccr5/Mgll/Lamb2/Kdm1a/Mag/Ctdp1/Fgf13/Smurf1/Impact/Tnfrsf12a/Cttn/Prmt2/Aurka/Apoe/Nrp2/Rufy3/Cxcr4/Gsk3b/Ptprs/Ndel1/Ddr1/Ulk2/Ttl/Golga4/Fubp1/Arih2/Spg20/Hdac6/Eif2ak4/Olfm1/Bcl11a/Itga4/Tiam1/Bmpr2/Raph1/Fn1/Rarg/Megf8/Pi16/Draxin	52
GO:1901215	negative regulation of neuron death	49/2628	233/23239	1.26085e-05	0.000146449	9.06973e-05	Cx3cl1/Ccl12/Gpnmb/Il10/Mt3/Kdr/Nr4a2/Igf1/Cebpb/Cd34/Nr4a3/Adam8/Birc5/Vegfb/Tgfb3/Fyn/Serpinf1/Il6/Gclc/C5ar1/Clcf1/Mag/Bhlhb9/Jak2/Dtnbp1/Lgmn/Axl/Stxbp1/Mt1/Apoe/Jun/Btg2/Hras/Gsk3b/Hif1a/Kras/Aars/Slc7a11/Ccl5/Retreg1/Rel/Set/Bcl2/Rack1/Prdx2/Chmp4b/Xiap/Draxin/Snca	49
GO:0050773	regulation of dendrite development	41/2628	183/23239	1.30874e-05	0.000151086	9.35689e-05	Csmd3/Dbn1/Lpar1/Elavl4/Fat3/Neurl1a/Lzts1/Arc/Lrp8/Akap5/Pacsin1/Plk2/Cit/Cdc20/Arf6/Ppp1r9a/Bhlhb9/Dtnbp1/Rac1/Nedd4/Stau2/Sgk1/Apoe/Rap2a/Eef2k/D16Ertd472e/Syne1/Gsk3b/Ptprs/Ezh2/Ywhah/Carm1/Baiap2/Sipa1l1/Rapgef2/Camk1/Bcl11a/Id1/Tiam1/Palm/Ache	41
GO:0007229	integrin-mediated signaling pathway	24/2628	86/23239	1.93306e-05	0.000210291	0.000130235	Timp1/Dab2/Itga9/Ctgf/Cdh17/Cd63/Itgad/Bcar1/Itgb5/Itgax/Itga6/Loxl3/Ptk2/Lat/Gab2/Vav3/Rcc2/Plek/Itga4/Itga1/Cd177/Itgb3/Itga2b/Mpig6b	24
GO:0050807	regulation of synapse organization	52/2628	257/23239	2.1493e-05	0.000227628	0.000140972	Flrt3/Sparc/Thbs2/Ephb3/Ptn/Sparcl1/Dbn1/Il10/Gpm6a/Neurl1a/Rapsn/Flrt2/Adgrb2/Arc/Etv5/Lrp8/Nrg2/Arhgap22/Adgrl2/Fyn/Abhd17c/Cdc20/Arf6/Lrp4/Prnp/Ppp1r9a/Bhlhb9/Dtnbp1/Clstn1/Nedd4/Stau2/Apoe/Klk8/Igsf9/Nrp2/Ptk2/Tubb5/Eef2k/Tlr2/Gsk3b/Ptprs/Abhd17b/Slc7a11/Baiap2/Sipa1l1/Tnf/Camk1/Chmp4b/Tiam1/Ptpro/Lrrn3/Snca	52
GO:0007409	axonogenesis	79/2628	448/23239	4.02358e-05	0.000398706	0.000246922	Flrt3/Atp8a2/Pmp22/Ptprm/Gas1/Ephb3/Dbn1/Dscaml1/Lpar3/Nr4a2/Ccdc141/Sema4c/Apbb2/Egr2/Flrt2/Tgfb2/Sema6d/Nr4a3/Scn1b/Ryk/Plxna1/Ifrd1/Skil/Rnd2/Ttc8/Stmn1/Unc5c/Ccr5/Mgll/Bcl11b/Lamb2/Lrp4/Mag/Fbxo45/Fgf13/Rac1/Dst/Stxbp1/Tnfrsf12a/Ust/Gata3/Cttn/Apoe/Matn2/Stxbp5/Nrp2/Rufy3/Ptk2/Plxnc1/Cxcr4/Gsk3b/Ptprs/Ndel1/Mapk8ip3/Ulk2/Runx3/Ttl/Usp33/Ablim1/Golga4/Spg20/Hdac6/Sipa1l1/Bcl2/Olfm1/Bcl11a/Emb/…	79
GO:0017015	regulation of transforming growth factor beta receptor signaling pathway	26/2628	101/23239	4.15591e-05	0.000410465	0.000254204	Dab2/Pmepa1/Cd109/Nrep/Folr1/Npnt/Cav1/Htra3/Rasl11b/Eid2/Thbs1/Cdkn2b/Got1/Skil/Bambi/Tgfb3/Htra1/Chst11/Smad6/Smurf1/Smad7/Ldlrad4/Hspa5/Axin1/Zeb1/Cited2	26
GO:0050803	regulation of synapse structure or activity	52/2628	264/23239	4.56908e-05	0.00044397	0.000274954	Flrt3/Sparc/Thbs2/Ephb3/Ptn/Sparcl1/Dbn1/Il10/Gpm6a/Neurl1a/Rapsn/Flrt2/Adgrb2/Arc/Etv5/Lrp8/Nrg2/Arhgap22/Adgrl2/Fyn/Abhd17c/Cdc20/Arf6/Lrp4/Prnp/Ppp1r9a/Bhlhb9/Dtnbp1/Clstn1/Nedd4/Stau2/Apoe/Klk8/Igsf9/Nrp2/Ptk2/Tubb5/Eef2k/Tlr2/Gsk3b/Ptprs/Abhd17b/Slc7a11/Baiap2/Sipa1l1/Tnf/Camk1/Chmp4b/Tiam1/Ptpro/Lrrn3/Snca	52
GO:0031670	cellular response to nutrient	14/2628	39/23239	5.20169e-05	0.000494243	0.000306089	Gas6/Folr1/Folr2/Cdkn2b/P2ry12/Vdr/Fyn/Pim1/Pdxp/Castor1/Trpm4/Med1/Cib2/Usf2	14
GO:0032673	regulation of interleukin-4 production	12/2628	30/23239	5.19393e-05	0.000494243	0.000306089	Prg2/Cd83/Cebpb/Tnfsf4/Havcr2/Gata3/Cd28/Lef1/Prkcq/Icosl/Rara/Irf4	12
GO:1903844	regulation of cellular response to transforming growth factor beta stimulus	26/2628	103/23239	5.95834e-05	0.000554726	0.000343547	Dab2/Pmepa1/Cd109/Nrep/Folr1/Npnt/Cav1/Htra3/Rasl11b/Eid2/Thbs1/Cdkn2b/Got1/Skil/Bambi/Tgfb3/Htra1/Chst11/Smad6/Smurf1/Smad7/Ldlrad4/Hspa5/Axin1/Zeb1/Cited2	26
GO:0120031	plasma membrane bounded cell projection assembly	84/2628	489/23239	6.0865e-05	0.000561435	0.000347701	Epha2/Pmp22/Cav1/Parva/Dbn1/Lpar1/Gpm6a/Adamts16/Dpysl3/Kank1/Lpar3/Fscn1/Actn2/Neurl1a/Wdr35/Kit/Wdr60/Sept3/Ccr7/Carmil1/Emp1/Hap1/P2ry12/Ttc8/Tgfb3/Stil/Avil/Dnaaf5/Bbs1/Arf6/Ssx2ip/Ppp1r9a/Rac1/Itga6/Stau2/S1pr1/Rilpl1/Cttn/Vav2/Bbs7/Fer/Rap2a/Bbs4/Hras/Syne1/Iqcb1/Anln/Cep41/Ehd1/Cep89/Ndel1/Tctn3/Ccl5/Atmin/Whamm/Prkcq/Tmem216/Vav3/Ccdc66/Tapt1/Rcc2/Ablim1/Hdac4/Aif1/Sept1/Rapgef2/Tmem138/C…	84
GO:0030198	extracellular matrix organization	49/2628	248/23239	6.8721e-05	0.000627158	0.000388404	Cyr61/Pmp22/Pdpn/Npnt/Phldb2/Aebp1/Ctgf/Sox9/Col14a1/Spint1/Fbln1/Mmp11/Col18a1/Fscn1/Gfap/Apbb2/Flrt2/Tgfb2/Plod2/Myo1e/P3h4/Col8a2/Olfml2b/Col27a1/Reck/Col11a2/Aplp1/Lamb2/Rgcc/Spint2/Col4a2/Col4a1/Efemp2/Loxl3/Ets1/Cma1/Adamts14/Sh3pxd2b/Ptk2/Creb3l1/Dpp4/Ddr1/B4galt1/Adamtsl4/Ero1l/Tnf/Fn1/Itgb3/Csgalnact1	49
GO:0034105	positive regulation of tissue remodeling	14/2628	40/23239	7.17406e-05	0.000652731	0.000404242	Spp1/Dcstamp/Adam8/Vdr/Ltbp3/Tfrc/Tmem64/Tnfrsf11a/Ptger4/B4galt1/Tmbim1/Rock2/Itgb3/Car2	14
GO:0035567	non-canonical Wnt signaling pathway	17/2628	55/23239	7.64374e-05	0.000682031	0.000422387	Dab2/Wnt11/Celsr1/Dact1/Ankrd6/Ryk/Znrf3/Gpc3/Rac1/Fzd5/Csnk1e/Fzd7/Dvl3/Rnf213/Tiam1/Rspo1/Celsr3	17
GO:0007219	Notch signaling pathway	38/2628	179/23239	9.15656e-05	0.000793437	0.000491382	Tmem100/Mmp14/Dll4/Sox9/Snai1/Bhlhe41/Neurl1a/Il2ra/Kit/Egfl7/Jag2/Tgfb2/Jag1/Got1/Reck/Bhlhe40/Eya1/Dtx4/Epn2/Dner/Bend6/Prag1/Notch4/Rbm15/Maml2/Pear1/Cdk6/Gdpd5/Cbfa2t2/Hes1/Nfkbia/Aph1a/Rps19/Bcl6/Pgam2/Slc35c1/Hp/Aph1b	38
GO:0007173	epidermal growth factor receptor signaling pathway	24/2628	95/23239	0.000111162	0.000933605	0.000578189	Tgfa/Gprc5a/Sox9/Neurl1a/Bcar1/Areg/Hbegf/Nrg2/Hap1/Errfi1/Akt1/Rhbdf1/Fer/Gab1/Hip1r/Ptk2/Fasl/Plcg1/Dusp3/Plaur/Mvb12b/Nup62/Itga1/Pde6h	24
GO:0032633	interleukin-4 production	13/2628	37/23239	0.000123696	0.00102454	0.000634508	Prg2/Cd83/Cebpb/Tnfsf4/Havcr2/Gata3/Itk/Cd28/Lef1/Prkcq/Icosl/Rara/Irf4	13
GO:0010976	positive regulation of neuron projection development	63/2628	350/23239	0.000127889	0.00105058	0.000650631	Htr7/Atp8a2/Cx3cl1/Adamts1/Sphk1/Ptn/Dbn1/Lpar1/Elavl4/Dpysl3/Lpar3/Neurl1a/Serpine2/Scn1b/Lif/Lrp8/Plxna1/Akap5/Pacsin1/S100a9/Hap1/Skil/Rnd2/Fyn/Serpinf1/Avil/Il6/Kdm1a/Fgfr1/P2ry2/Ppp1r9a/Bhlhb9/Rac1/Stau2/Smurf1/Tnfrsf12a/Sgk1/Apoe/Rufy3/Eef2k/D16Ertd472e/Plxnc1/Cbfa2t2/Cxcr4/Gsk3b/Ehd1/Ndel1/Hspa5/Ezh2/Golga4/Rrn3/Baiap2/Arsb/Dvl3/Rapgef2/Camk1/Bcl11a/Tiam1/Bmpr2/Palm/Fn1/Megf8/Ache	63
GO:0032753	positive regulation of interleukin-4 production	10/2628	24/23239	0.000146952	0.00116999	0.000724582	Prg2/Cebpb/Tnfsf4/Havcr2/Gata3/Cd28/Prkcq/Icosl/Rara/Irf4	10
GO:0060563	neuroepithelial cell differentiation	20/2628	74/23239	0.000150829	0.00119332	0.000739031	Wnt11/Kcnma1/Atp2b2/Clic5/Serpine1/Sox4/Cebpb/Jag2/Jag1/Mycl/Gfi1/Mcoln3/Whrn/Fgfr1/Rac1/Fam20c/Lef1/Hes1/Alg10b/Scrib	20
GO:0099173	postsynapse organization	38/2628	184/23239	0.000167418	0.00128898	0.000798278	Cadm1/Ephb3/Ptn/Dbn1/Rapsn/Ctnnd2/Arc/Etv5/Lrp8/Arhgap22/Fyn/Abhd17c/Ndrg2/Arf6/Lrp4/Prnp/Ppp1r9a/Bhlhb9/Dtnbp1/Lgmn/Stau2/Cttn/Apoe/Ophn1/Nrp2/Eef2k/Ptprs/Abhd17b/Slc7a11/Baiap2/Rock2/Hdac6/Sipa1l1/Insr/Wasf2/Chmp4b/Tiam1/Ndrg1	38
GO:0043524	negative regulation of neuron apoptotic process	36/2628	172/23239	0.000185886	0.00140585	0.000870653	Cx3cl1/Ccl12/Mt3/Kdr/Nr4a2/Cebpb/Nr4a3/Adam8/Birc5/Vegfb/Tgfb3/Fyn/Gclc/C5ar1/Clcf1/Mag/Bhlhb9/Jak2/Lgmn/Axl/Stxbp1/Mt1/Apoe/Jun/Btg2/Hras/Hif1a/Kras/Aars/Retreg1/Set/Bcl2/Prdx2/Xiap/Draxin/Snca	36
GO:0008593	regulation of Notch signaling pathway	21/2628	81/23239	0.000197528	0.00148828	0.000921703	Mmp14/Dll4/Neurl1a/Kit/Egfl7/Jag2/Tgfb2/Jag1/Reck/Eya1/Epn2/Bend6/Prag1/Notch4/Pear1/Gdpd5/Cbfa2t2/Hes1/Nfkbia/Bcl6/Slc35c1	21
GO:1990138	neuron projection extension	38/2628	186/23239	0.000211042	0.00157234	0.000973764	Flrt3/Dbn1/Sema4c/Sema6d/Ryk/Plxna1/Ifrd1/Ccr5/Mgll/Lamb2/Kdm1a/Mag/Smurf1/Impact/Tnfrsf12a/Cttn/Aurka/Apoe/Nrp2/Rufy3/Cxcr4/Gsk3b/Ptprs/Ndel1/Ddr1/Ulk2/Ttl/Golga4/Eif2ak4/Olfm1/Bcl11a/Itga4/Tiam1/Bmpr2/Raph1/Fn1/Megf8/Draxin	38
GO:0038127	ERBB signaling pathway	25/2628	105/23239	0.000222415	0.00163458	0.00101231	Tgfa/Gprc5a/Sox9/Neurl1a/Bcar1/Areg/Hbegf/Nrg2/Hap1/Errfi1/Lgmn/Akt1/Rhbdf1/Fer/Gab1/Hip1r/Ptk2/Fasl/Plcg1/Dusp3/Plaur/Mvb12b/Nup62/Itga1/Pde6h	25
GO:0014041	regulation of neuron maturation	8/2628	17/23239	0.000250323	0.00180239	0.00111623	Rac3/Ednrb/Rac1/Gsk3b/Bcl2/Bcl11a/Dleu2/Tbx6	8
GO:0034103	regulation of tissue remodeling	21/2628	83/23239	0.000284598	0.00200588	0.00124226	Spp1/Gpnmb/Gja1/Dcstamp/Adam8/Vdr/Ltbp3/Tfrc/Il6/Tmem64/S1pr1/Cd38/Tnfrsf11a/Ptger4/B4galt1/Inpp4b/Suco/Tmbim1/Rock2/Itgb3/Car2	21
GO:0030900	forebrain development	66/2628	382/23239	0.000301065	0.0020709	0.00128252	Sall1/Sall3/Msx1/Ephb3/Mfsd2a/Aldh1a2/Nr4a2/Ccdc141/Nr2f2/Nr4a3/Ryk/Lrp8/Rtn4rl1/Bmpr1a/Slc1a2/Hap1/P2ry12/Kif1a/Chd7/Ttc8/Inhba/Stil/Aplp1/Fyn/Tacc2/Bbs1/Bcl11b/Kdm1a/Fgfr1/Fbxo45/Fgf13/Rac3/Btbd3/Rac1/Axl/Kdm6b/Jakmip1/Tcf7l2/Adgrg1/Btg2/Eomes/Ophn1/Nrp2/Bbs4/Gdpd5/Tacc3/Lef1/D16Ertd472e/Cxcr4/Gsk3b/Ptprs/Hif1a/Ndel1/Kras/Twsg1/Mapk8ip3/Mkl2/Hes1/Slc7a11/Gnaq/Rapgef2/Dbi/Pgap1/Dync2h1/Hmga2/Dra…	66
GO:0106027	neuron projection organization	23/2628	96/23239	0.000353963	0.00237492	0.00147081	Ephb3/Dbn1/Ctnnd2/Arc/Lrp8/Fyn/Prnp/Ppp1r9a/Bhlhb9/Dtnbp1/Lgmn/Stau2/Cttn/Apoe/Eef2k/Gsk3b/Abhd17b/Baiap2/Hdac6/Sipa1l1/Insr/Tiam1/Abcd2	23
GO:0048678	response to axon injury	17/2628	62/23239	0.000383095	0.00251694	0.00155876	Flrt3/Nrep/Folr1/Dpysl3/Rtn4rl1/P2ry12/Mmp2/Lamb2/Mag/Jak2/Jun/Klk8/Matn2/Ptprs/Ndel1/Mapk8ip3/Bcl2	17
GO:0060491	regulation of cell projection assembly	37/2628	185/23239	0.000392256	0.00255289	0.00158103	Epha2/Cav1/Dbn1/Gpm6a/Adamts16/Dpysl3/Kank1/Fscn1/Neurl1a/Kit/Ccr7/Hap1/P2ry12/Tgfb3/Arf6/Ppp1r9a/Rac1/Stau2/Fer/Bbs4/Hras/Syne1/Anln/Ndel1/Atmin/Prkcq/Tapt1/Rcc2/Hdac4/Cdc42ep3/Wasf2/Sept9/Cdc42ep2/Kctd17/Palm/Sh3yl1/Cdc42ep5	37
GO:0048813	dendrite morphogenesis	35/2628	172/23239	0.000396778	0.00256199	0.00158666	Ephb3/Dbn1/Elavl4/Dact1/Ctnnd2/Lzts1/Arc/Lrp8/Akap5/Fyn/Cit/Lrp4/Ppp1r9a/Bhlhb9/Dtnbp1/Btbd3/Rac1/Nedd4/Stau2/Sgk1/Rap2a/Eef2k/Syne1/Gsk3b/Ywhah/Baiap2/Rock2/Hdac6/Sipa1l1/Rapgef2/Id1/Cacna1f/Tiam1/Ache/Celsr2	35
GO:0050770	regulation of axonogenesis	39/2628	201/23239	0.000522655	0.00318262	0.00197102	Ephb3/Dbn1/Lpar3/Sema4c/Sema6d/Ryk/Plxna1/Ifrd1/Skil/Rnd2/Ccr5/Mgll/Lrp4/Mag/Fgf13/Tnfrsf12a/Ust/Cttn/Apoe/Rufy3/Ptk2/Plxnc1/Gsk3b/Ptprs/Ndel1/Ulk2/Ttl/Golga4/Spg20/Sipa1l1/Olfm1/Bcl11a/Tiam1/Zswim6/Bmpr2/Fn1/Megf8/Ache/Draxin	39
GO:0099149	regulation of postsynaptic neurotransmitter receptor internalization	9/2628	23/23239	0.000552656	0.00333873	0.00206771	Arc/Akap5/Pacsin1/Hap1/Nedd4/Ophn1/Syne1/Scrib/Itgb3	9
GO:0097061	dendritic spine organization	21/2628	88/23239	0.000662767	0.00386097	0.00239113	Ephb3/Dbn1/Ctnnd2/Arc/Lrp8/Fyn/Prnp/Ppp1r9a/Bhlhb9/Dtnbp1/Lgmn/Stau2/Cttn/Apoe/Eef2k/Abhd17b/Baiap2/Hdac6/Sipa1l1/Insr/Tiam1	21
GO:0060998	regulation of dendritic spine development	21/2628	88/23239	0.000662767	0.00386097	0.00239113	Dbn1/Lpar1/Neurl1a/Arc/Lrp8/Plk2/Arf6/Ppp1r9a/Bhlhb9/Dtnbp1/Rac1/Stau2/Apoe/Eef2k/D16Ertd472e/Ptprs/Baiap2/Sipa1l1/Camk1/Tiam1/Palm	21
GO:0007611	learning or memory	50/2628	282/23239	0.000850421	0.00475934	0.0029475	Htr7/Synpo/Ptgs2/Ptn/Elavl4/Stra6/Atp1a2/Kit/Hrh1/Igf1/Ctnnd2/Egr1/Arc/Il1b/Plk2/Gatm/Il1rn/Serpinf1/Prnp/Fgf13/Bhlhb9/Adcy3/Ptgs1/Lgmn/Prkar1b/Sgk1/Apoe/Jun/Klk8/Itpr3/Btg2/Hrh2/Ccnd2/Tlr2/Hif1a/Rcan1/Kras/Slc7a11/Atxn1/Eif2ak4/Dbi/Tifab/Pomk/Abca7/Pde8b/Ap1s2/Prkar2b/Eif4ebp2/Thra/Slc6a4	50
GO:0001764	neuron migration	35/2628	179/23239	0.000849916	0.00475934	0.0029475	Gas6/Gja1/Gpm6a/Celsr1/Fat3/Nr4a2/Nr2f2/Apbb2/Flrt2/Cdh1/Lrp12/Fyn/Bbs1/Fbxo45/Fgf13/Rac1/Kif20b/Axl/Gata3/Matn2/Adgrg1/Nrp2/Bbs4/Ptk2/Cxcr4/Gsk3b/Ndel1/Mapk8ip3/Mkl2/Rapgef2/Olfm1/Pomk/Zswim6/Celsr3/Celsr2	35
GO:0042551	neuron maturation	14/2628	50/23239	0.000976433	0.00533529	0.00330419	Cspg4/Pmp22/Ntn4/Nr4a2/Pdgfb/Rac3/Ednrb/Rac1/Gsk3b/Gnaq/Bcl2/Bcl11a/Dleu2/Tbx6	14
GO:0031102	neuron projection regeneration	15/2628	56/23239	0.00107939	0.00576666	0.00357134	Nrep/Folr1/Gfap/Rtn4rl1/Mmp2/Lamb2/Mag/Jak2/Jun/Klk8/Matn2/Ptprs/Ndel1/Mapk8ip3/Bcl2	15
GO:2000050	regulation of non-canonical Wnt signaling pathway	9/2628	25/23239	0.00112002	0.00595724	0.00368937	Dab2/Dact1/Ankrd6/Znrf3/Gpc3/Csnk1e/Rnf213/Tiam1/Rspo1	9
GO:0060996	dendritic spine development	25/2628	118/23239	0.00139564	0.00718767	0.00445138	Ephb3/Dbn1/Lpar1/Neurl1a/Ctnnd2/Arc/Lrp8/Spire1/Plk2/Arf6/Ppp1r9a/Bhlhb9/Dtnbp1/Rac1/Stau2/Apoe/Eef2k/D16Ertd472e/Ptprs/Baiap2/Hdac6/Sipa1l1/Camk1/Tiam1/Palm	25
GO:0035023	regulation of Rho protein signal transduction	27/2628	131/23239	0.00141889	0.00728865	0.00451392	Arhgef25/Lpar1/Kank1/Arhgef40/Lpar4/Plekhg5/P2ry10/Net1/Stmn1/Ect2/Abca1/Prag1/Arhgef39/Vav2/Apoe/Adgrg1/Ophn1/Arhgef10/Vav3/Dnmbp/Arhgef37/Bcl6/Tiam1/Gpr18/P2ry10b/Arhgef18/Trio	27
GO:0010712	regulation of collagen metabolic process	14/2628	52/23239	0.00148311	0.0075861	0.00469814	Ctgf/Cyp2j6/Serpine1/Ccl2/Got1/Tgfb3/Il6/Errfi1/Pdgfb/Rgcc/Creb3l1/Pparg/Suco/Cbx8	14
GO:0030574	collagen catabolic process	9/2628	26/23239	0.00154266	0.00782404	0.0048455	Ctsk/Mrc2/Mmp14/Mmp11/Mmp7/Mmp2/Ctsb/Mmp19/Mmp8	9
GO:0060071	Wnt signaling pathway, planar cell polarity pathway	11/2628	36/23239	0.00154038	0.00782404	0.0048455	Dab2/Wnt11/Celsr1/Dact1/Ankrd6/Ryk/Znrf3/Gpc3/Rac1/Dvl3/Celsr3	11
GO:0042552	myelination	29/2628	145/23239	0.00157759	0.00796122	0.00493045	Pmp22/Mpdz/Jam3/Egr2/Epb41l3/Fyn/Cmtm8/Marveld1/Ifng/Mag/Hexb/Akt1/Klk8/Nab1/Tcf7l2/Zscan26/Tlr2/Gpc1/Cxcr4/Nab2/Arhgef10/Tnf/Cd9/Tspan2/Rara/Abcd2/Rarg/Ndrg1/Clu	29
GO:0031103	axon regeneration	13/2628	47/23239	0.00165665	0.00827435	0.00512438	Nrep/Folr1/Rtn4rl1/Mmp2/Lamb2/Mag/Jak2/Jun/Klk8/Ptprs/Ndel1/Mapk8ip3/Bcl2	13
GO:0071774	response to fibroblast growth factor	20/2628	88/23239	0.00167186	0.00832462	0.00515551	Flrt3/Shcbp1/Kl/Dll4/Ctgf/Flrt2/Thbs1/Fgf1/Spry2/Spry1/Pdgfb/Nr4a1/Fgfr1/Gata3/Fam20c/Tcf7l2/Zfp36l1/Creb3l1/Gpc1/Grb2	20

## Sheet: CC
ID	Description	GeneRatio	BgRatio	pvalue	p.adjust	qvalue	geneID	Count
GO:0014069	postsynaptic density	89/2670	387/23416	5.8739e-11	4.09999e-09	3.19664e-09	Flrt3/Cadm1/Rgs7bp/Dbn1/Tanc2/Rgs9/Grasp/Dlgap1/Atp2b2/Actn2/Neurl1a/Sema4c/Epb41l3/Nr3c2/Ctnnd2/Lzts1/Arc/Lrp8/Akap5/Pacsin1/Gria3/Fyn/Abhd17c/Lrp4/Erc1/Fbxo45/Ppp2ca/Prnp/Ppp1r9a/Dtnbp1/Clstn1/Fxr2/Epb41l1/Dst/Camk2n1/Dlg3/Hip1r/Map3k7/Eef2k/Fabp5/Pde4b/Gsk3b/Plekha5/Ptprs/Abhd17b/Entpd1/Dynll2/Cnn3/Axin1/Ablim1/Baiap2/Sipa1l1/Camk1/Rpl14/Rpl6/Rps19/P2ry1/Rps3/Bcl11a/Chmp4b/Rpl38/Pcbp2/Tiam1/Pt…	89
GO:0032279	asymmetric synapse	89/2670	390/23416	9.0288e-11	5.72918e-09	4.46688e-09	Flrt3/Cadm1/Rgs7bp/Dbn1/Tanc2/Rgs9/Grasp/Dlgap1/Atp2b2/Actn2/Neurl1a/Sema4c/Epb41l3/Nr3c2/Ctnnd2/Lzts1/Arc/Lrp8/Akap5/Pacsin1/Gria3/Fyn/Abhd17c/Lrp4/Erc1/Fbxo45/Ppp2ca/Prnp/Ppp1r9a/Dtnbp1/Clstn1/Fxr2/Epb41l1/Dst/Camk2n1/Dlg3/Hip1r/Map3k7/Eef2k/Fabp5/Pde4b/Gsk3b/Plekha5/Ptprs/Abhd17b/Entpd1/Dynll2/Cnn3/Axin1/Ablim1/Baiap2/Sipa1l1/Camk1/Rpl14/Rpl6/Rps19/P2ry1/Rps3/Bcl11a/Chmp4b/Rpl38/Pcbp2/Tiam1/Pt…	89
GO:0098984	neuron to neuron synapse	91/2670	415/23416	5.08697e-10	2.73131e-08	2.12953e-08	Flrt3/Cadm1/Rgs7bp/Dbn1/Tanc2/Rgs9/Grasp/Dlgap1/Atp2b2/Actn2/Neurl1a/Sema4c/Epb41l3/Nr3c2/Ctnnd2/Lzts1/Arc/Lrp8/Akap5/Pacsin1/Gria3/Fyn/Abhd17c/Lrp4/Erc1/Fbxo45/Ppp2ca/Prnp/Ppp1r9a/Dtnbp1/Clstn1/Fxr2/Epb41l1/Dst/Prkar1b/Camk2n1/Stxbp5/Dlg3/Hip1r/Map3k7/Eef2k/Fabp5/Pde4b/Gsk3b/Plekha5/Ptprs/Abhd17b/Entpd1/Dynll2/Cnn3/Axin1/Ablim1/Baiap2/Sipa1l1/Camk1/Rpl14/Rpl6/Rps19/P2ry1/Rps3/Bcl11a/Chmp4b/Rpl38…	91
GO:0099572	postsynaptic specialization	92/2670	426/23416	9.36079e-10	4.66702e-08	3.63874e-08	Flrt3/Cadm1/Rgs7bp/Dbn1/Tanc2/Rgs9/Grasp/Dlgap1/Atp2b2/Yes1/Actn2/Neurl1a/Sema4c/Rapsn/Epb41l3/Nr3c2/Ctnnd2/Lzts1/Arc/Lrp8/Akap5/Pacsin1/Gria3/Fyn/Abhd17c/Lrp4/Erc1/Fbxo45/Ppp2ca/Prnp/Ppp1r9a/Dtnbp1/Clstn1/Fxr2/Epb41l1/Dst/Camk2n1/Dlg3/Hip1r/Lck/Map3k7/Eef2k/Fabp5/Pde4b/Gsk3b/Plekha5/Ptprs/Abhd17b/Entpd1/Dynll2/Cnn3/Axin1/Ablim1/Baiap2/Sipa1l1/Camk1/Rpl14/Rpl6/Rps19/P2ry1/Rps3/Bcl11a/Chmp4b/Rpl38…	92
GO:0062023	collagen-containing extracellular matrix	73/2670	330/23416	1.74473e-08	5.53554e-07	4.3159e-07	Timp1/Sparc/Adamts1/P3h2/Cspg4/Pmp22/Thbs2/Prg2/Npnt/Bmp1/Lad1/Ptn/Plxdc2/Col6a3/Sparcl1/Sod3/Lama4/F3/Ntn4/Col14a1/Fbln1/Adamtsl5/Col18a1/Mfap2/Serpine1/Igf1/Egfl7/Thbs1/Tgm2/Igfbp7/Serpine2/Tgfb2/Elane/Sema6d/Timp3/Col8a2/Col27a1/Col11a2/Tgfb3/Ctsd/Gpc3/Timp2/Serpinf1/Htra1/Lamb2/Col4a2/Itga6/Nav2/Ctsl/Col4a1/Emid1/Matn2/Efemp2/Spon1/Itih5/Lamb3/Gpc1/Serpinb9/Entpd1/Adamtsl4/Ctsb/Il16/Vcan/F13a…	73
GO:0031012	extracellular matrix	92/2670	474/23416	2.04486e-07	5.48965e-06	4.28012e-06	Timp1/Sparc/Cyr61/Adamts1/P3h2/Cspg4/Pmp22/Thbs2/Prg2/Npnt/Bmp1/Lad1/Ptn/Plxdc2/Wnt11/Col6a3/Sparcl1/Sod3/Mmp14/Lama4/F3/Ntn4/Ctgf/Col14a1/Fbln1/Mmp23/Adamtsl5/Mmp11/Col18a1/Mfap2/Mmp7/Serpine1/Igf1/Egfl7/Thbs1/Tgm2/Fgf1/Igfbp7/Serpine2/Mmp12/Tgfb2/Elane/Sema6d/Timp3/Col8a2/Il1rl1/Olfml2b/Col27a1/Col11a2/Tgfb3/Mmp2/Ctsd/Gpc3/Ltbp3/Timp2/Serpinf1/Mmp25/Htra1/Lamb2/Col4a2/Itga6/Nav2/Ctsl/Col4a1/Emi…	92
GO:0043197	dendritic spine	39/2670	190/23416	0.000188293	0.00205358	0.00160111	Slc1a3/Synpo/Rgs7bp/Dbn1/Lpar1/Atp1a2/Neurl1a/Lzts1/Akap5/Slc1a2/Gria3/Ppp1r9a/Prkaca/Dtnbp1/Clstn1/Rac1/Nedd4/Fxr2/Hip1r/Ophn1/Ptk2/Eef2k/Pdlim4/Syne1/Pde4b/Gsk3b/Cnn3/Baiap2/Sipa1l1/Tiam1/Ptpro/Prkar2b/Ppp1r9b/Ctnnd1/Palm/Apba1/Cald1/Mpp2/Nrgn	39
GO:0044309	neuron spine	39/2670	193/23416	0.000263931	0.00252362	0.00196759	Slc1a3/Synpo/Rgs7bp/Dbn1/Lpar1/Atp1a2/Neurl1a/Lzts1/Akap5/Slc1a2/Gria3/Ppp1r9a/Prkaca/Dtnbp1/Clstn1/Rac1/Nedd4/Fxr2/Hip1r/Ophn1/Ptk2/Eef2k/Pdlim4/Syne1/Pde4b/Gsk3b/Cnn3/Baiap2/Sipa1l1/Tiam1/Ptpro/Prkar2b/Ppp1r9b/Ctnnd1/Palm/Apba1/Cald1/Mpp2/Nrgn	39
GO:0008305	integrin complex	11/2670	33/23416	0.000733071	0.00588142	0.00458558	Pmp22/Npnt/Itga9/Itgad/Itgb5/Itgax/Itga6/Itga4/Itga1/Itgb3/Itga2b	11

## Sheet: MF
ID	Description	GeneRatio	BgRatio	pvalue	p.adjust	qvalue	geneID	Count
GO:0005178	integrin binding	37/2625	122/22744	1.91185e-08	2.90327e-06	2.36034e-06	Dab2/Cyr61/Vcam1/Cx3cl1/Gpnmb/Npnt/Mmp14/Ctgf/Jam3/Fbln1/Cdh17/Kdr/Gfap/Igf1/Thbs1/Fgf1/Cxadr/Itgb5/Adam8/Il1b/Cd81/Timp2/Tspan4/Lamb2/Itga6/Ptk2/Gsk3b/Adam9/Lgals8/Cd9/Icam2/Cib2/Cd151/Fn1/Cd177/Itgb3/Vwf	37
GO:0005125	cytokine activity	51/2625	214/22744	3.11935e-07	1.95802e-05	1.59186e-05	Ccl22/Il1a/Timp1/Spp1/Ccl8/Ccl7/Cx3cl1/Ccl12/Cxcl14/Il12b/Gdf15/Bmp1/Cxcl11/Il10/Osm/Cxcl3/Kitl/Cxcl16/Ccl17/Areg/Tgfb2/Tnfsf4/Ccl2/Lif/Il1b/Tnfsf9/Ccl24/Ccl4/Tgfb3/Inhba/Ccl3/Il1rn/Cmtm8/Il6/Cxcl2/Ifng/Tnfsf8/Clcf1/Cxcl9/Csf1/Fasl/Cxcl10/Ccl5/Tnf/Ccl25/Il16/Tnfsf13b/Ccl9/Ctf2/Il23a/Ppbp	51
GO:0005518	collagen binding	24/2625	69/22744	3.55701e-07	1.99005e-05	1.6179e-05	Sparc/Ctsk/Cspg4/Mrc2/Sparcl1/Pcolce/Aebp1/Itga9/Thbs1/Mmp12/Pdgfa/Pdgfb/Smad7/Adgrg1/Gpc1/Dpp4/Ddr1/Ctsb/Adam9/Itga1/Ache/Vwf/Gp6/Gp5	24
GO:0019838	growth factor binding	39/2625	147/22744	4.18239e-07	2.22294e-05	1.80723e-05	Cyr61/Cd109/Kl/Ptn/Htra3/Ctgf/A2m/Kdr/Il2ra/Thbs1/Igfbp2/Igfbp7/Il1r2/Bmpr1a/Hap1/Tgfb3/Ltbp3/Il1rn/Pdgfa/Htra1/Pdgfb/Pdxp/Fgfr1/Itga6/Igf2r/Dusp1/Col4a1/Cd36/Igfbp4/Gpc1/Twsg1/Insr/Rps19/Sec61b/Il3ra/Bmpr2/Rpl37/Acvr1b/Itgb3	39
GO:0019955	cytokine binding	35/2625	128/22744	7.43928e-07	3.16318e-05	2.57164e-05	Cd109/Pdpn/Il12b/Ackr3/Sostdc1/A2m/Il2ra/Kit/Cxcr6/Thbs1/Elane/Il1r2/Ccr7/Nbl1/Il1rl1/Tgfb3/Ccrl2/Ltbp3/Il1rn/Ccr5/Il12rb1/Il18r1/Il18bp/Cd36/Tnfrsf11a/Cd74/Cxcr4/Ccr1/Tnfrsf9/Twsg1/Il27ra/Itga4/Il3ra/Bmpr2/Itgb3	35
GO:0005126	cytokine receptor binding	67/2625	322/22744	1.10519e-06	4.35118e-05	3.53747e-05	Ccl22/Il1a/Ccl8/Ccl7/Cx3cl1/Ccl12/Cxcl14/Il12b/Gdf15/Cxcl11/Il10/Rasl11b/Osm/Cxcl3/Kitl/Cxcl16/Ccl17/Angpt2/Tgfb2/Tnfsf4/Ccl2/Lif/Il1b/Vegfb/Tnfsf9/Ccl24/Ccl4/Socs2/Tgfb3/Ccrl2/Inhba/Ccl3/Il1rn/Traf4/Il6/Cxcl2/Il12rb1/Ifng/Tnfsf8/Clcf1/Traf1/Cxcl9/Jak2/Smad6/Csf1/Cd300lf/Gata3/Smad7/Spred1/Bex3/Fasl/Cxcl10/Plcg1/Ccl5/Tlr5/Nsmaf/Tmbim1/Grb2/Tnf/Ccl25/Tnfsf13b/Cd2ap/Ccl9/Itgb3/Ctf2/Il23a/Ppbp	67
GO:0005520	insulin-like growth factor binding	11/2625	28/22744	0.000155709	0.00306517	0.00249196	Cyr61/Htra3/Ctgf/Igfbp2/Igfbp7/Htra1/Itga6/Igf2r/Igfbp4/Insr/Itgb3	11
GO:0070851	growth factor receptor binding	32/2625	144/22744	0.000190027	0.00360713	0.00293256	Il1a/Flrt3/Tgfa/Kl/Il10/Yes1/Flrt2/Areg/Angpt2/Fgf1/Il1b/Hbegf/Vegfb/Nrg2/Il1rn/Fyn/Il6/Pdgfa/Il12rb1/Pdgfb/Jak2/Cd300lf/Gata3/Vav2/Fer/Plscr1/Tlr5/Vav3/Atxn2/Grb2/Cd2ap/Itgb3	32
GO:0050840	extracellular matrix binding	16/2625	59/22744	0.000804649	0.0097198	0.00790212	Spp1/Sparc/Cyr61/Sparcl1/Itga9/Ntn4/Thbs1/Olfml2b/Itga6/Adgrg1/Gpc1/Adam9/Rpsa/Itgb3/Ache/Itga2b	16
